# Supplementary material for: Exploration of the potential efficacy of natural resource-derived blue-emitting graphene quantum dots in cancer therapeutic applications
Source: Royal Society of Chemistry journal article supplement (doi:10.1039/c9nj06239d), 2020-01-01
Supplement: c9nj06239d1.pdf [file c9nj06239d1.pdf]

## Supplementary Information

for

### Exploration of the Potential Efficacy of Natural Resource Derived Blue Emitting Graphene Quantum Dots in Cancer Therapeutic Application

Soumitra Ghorai\*<sup>1</sup>, Indranil Roy<sup>2</sup>, Sriparna De<sup>3</sup>, Pratik Swarup Dash<sup>1</sup>, Arijita Basu<sup>2</sup>, Dipankar Chattopadhyay\*<sup>2</sup>

<sup>1</sup> Research & Development Division, Tata Steel, Jamshedpur 831007, India

<sup>2</sup> Department of Polymer Science and Technology, University of Calcutta, Kolkata 700009, India

<sup>3</sup> Department of Allied Health Science, Brainware University, Kolkata 700125, India

\* Corresponding author:

E-mail: [soumitra.ghorai@tatasteel.com](mailto:soumitra.ghorai@tatasteel.com); [soumitrachemist@gmail.com](mailto:soumitrachemist@gmail.com); Tel: 0091-7033094953

E-mail: [dipankar.chattopadhyay@gmail.com](mailto:dipankar.chattopadhyay@gmail.com); Tel: 0091-9433379034

## Chemicals:

Bituminous coal (CDPCI) was utilized as received and crushed into powder (72 mesh) for synthesis purpose. HCl (Merck, India), HNO<sub>3</sub> (Merck, India), Oxone (Sigma-Aldrich, USA) and DMF (Merck, India) were utilized as received. Here, double distilled water was utilized for experimental work. For the preparation of Dulbecco's Modified Eagle's Medium (DMEM) media, penicillin and streptomycin were purchased from Sigma-Aldrich, USA. Fetal bovine serum (FBS) was procured from GIBCO/Invitrogen. 4',6-Diamidino-2-phenylindole dihydrochloride (DAPI) and 3-(4,5-dimethyl-2-thiazolyl)-2,5-diphenyl-tetrazolium bromide (MTT) reagent was purchased from Sigma-Aldrich, USA and Himedia, India respectively.

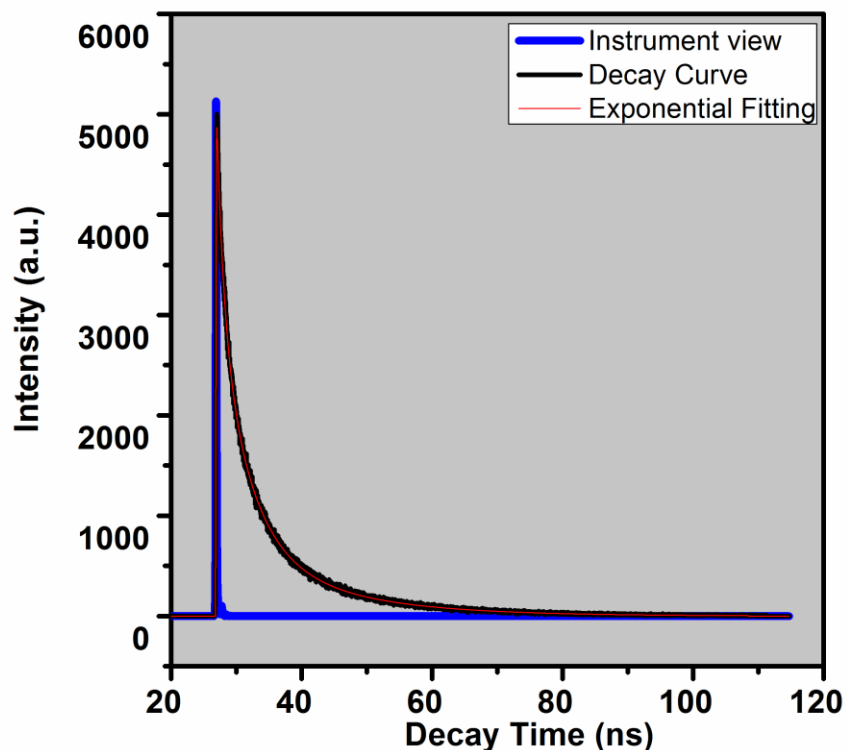

**Fig. S1:** TRPL decay profile of blue GQDs at room temperature.

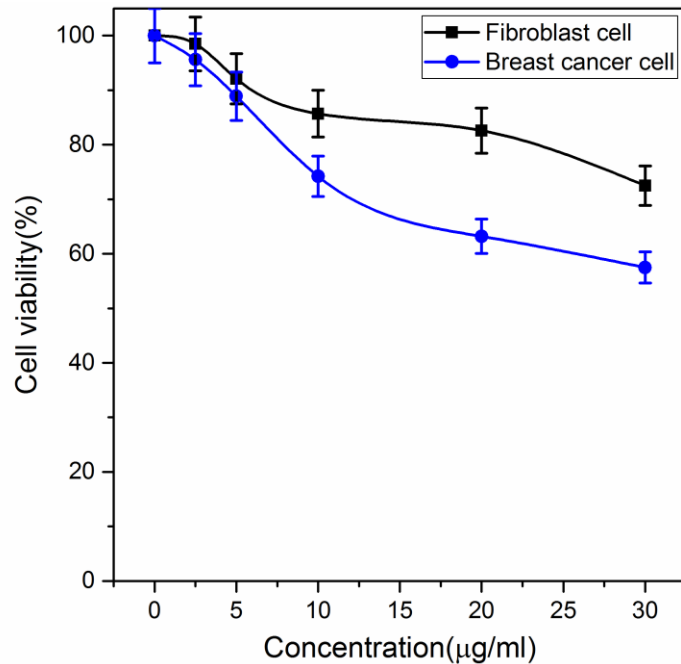

**Fig. S2:** Cell viability of fibroblast and breast cancer cell lines

**Table S1:** Comparison of GQDs Quantum Yield derived from coal

| Sl. No. | References                                                                                                                    | Quantum Yield (Q.Y) |
|---------|-------------------------------------------------------------------------------------------------------------------------------|---------------------|
| 1       | Methods of producing graphene quantum dots from coal and coke (Patent: WO2014179708A1)                                        | 5.35 %              |
| 2       | Coal as an abundant source of graphene quantum dots (Nature Communications; 2013, 4, 2943, DOI: 10.1038/ncomms3943)           | 1.0 %               |
| 3       | Graphene quantum dots, graphene oxide, carbon quantum dots and graphite nanocrystals in coals (Nanoscale, 2014, 6, 7410–7415) | 1.8 %               |
| 4       | Present Study                                                                                                                 | 14.42 %             |
